# Supplementary material
Source: publisher site journal article supplement (https://www.dovepress.com/article/361362)
Supplement: Supplementary file 1 [file get_supplementary_file.php]

Supplementary Materials

##
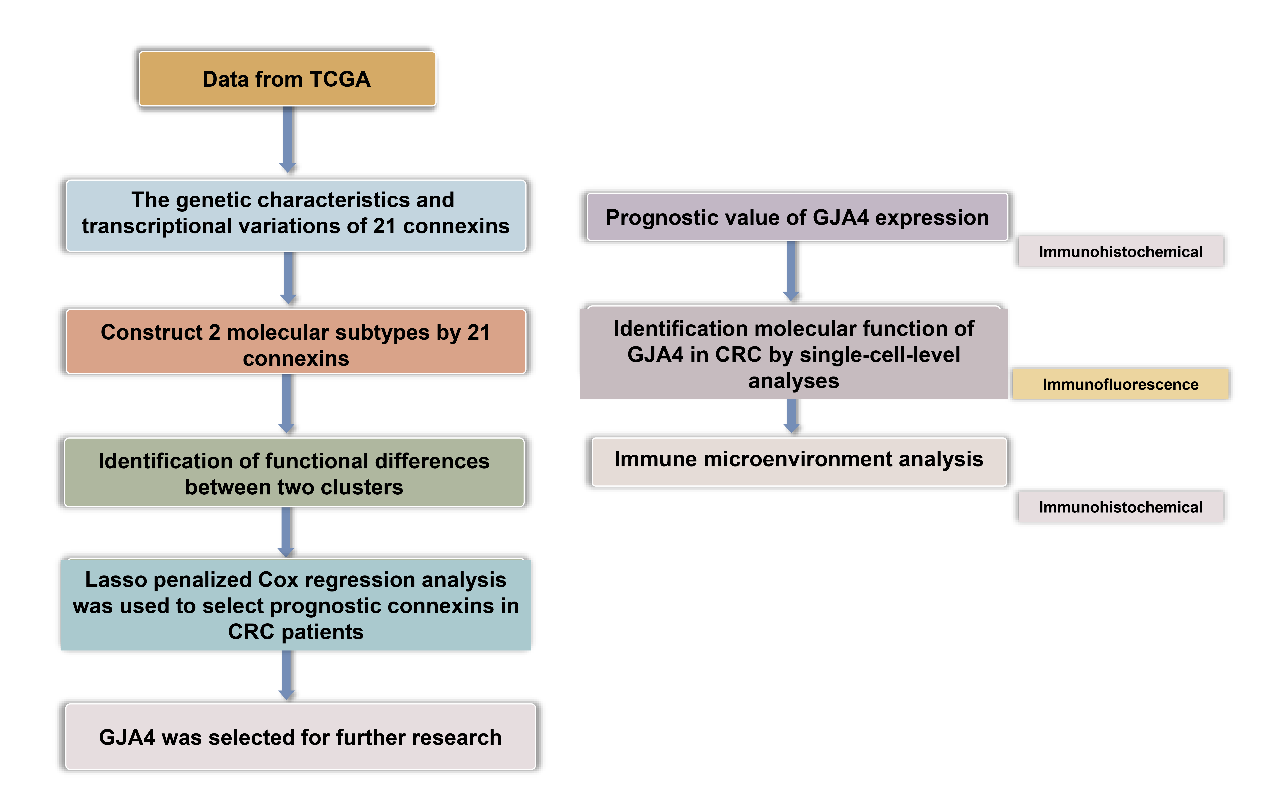


**Supplementary Figure 1.** Research flow chart of the study


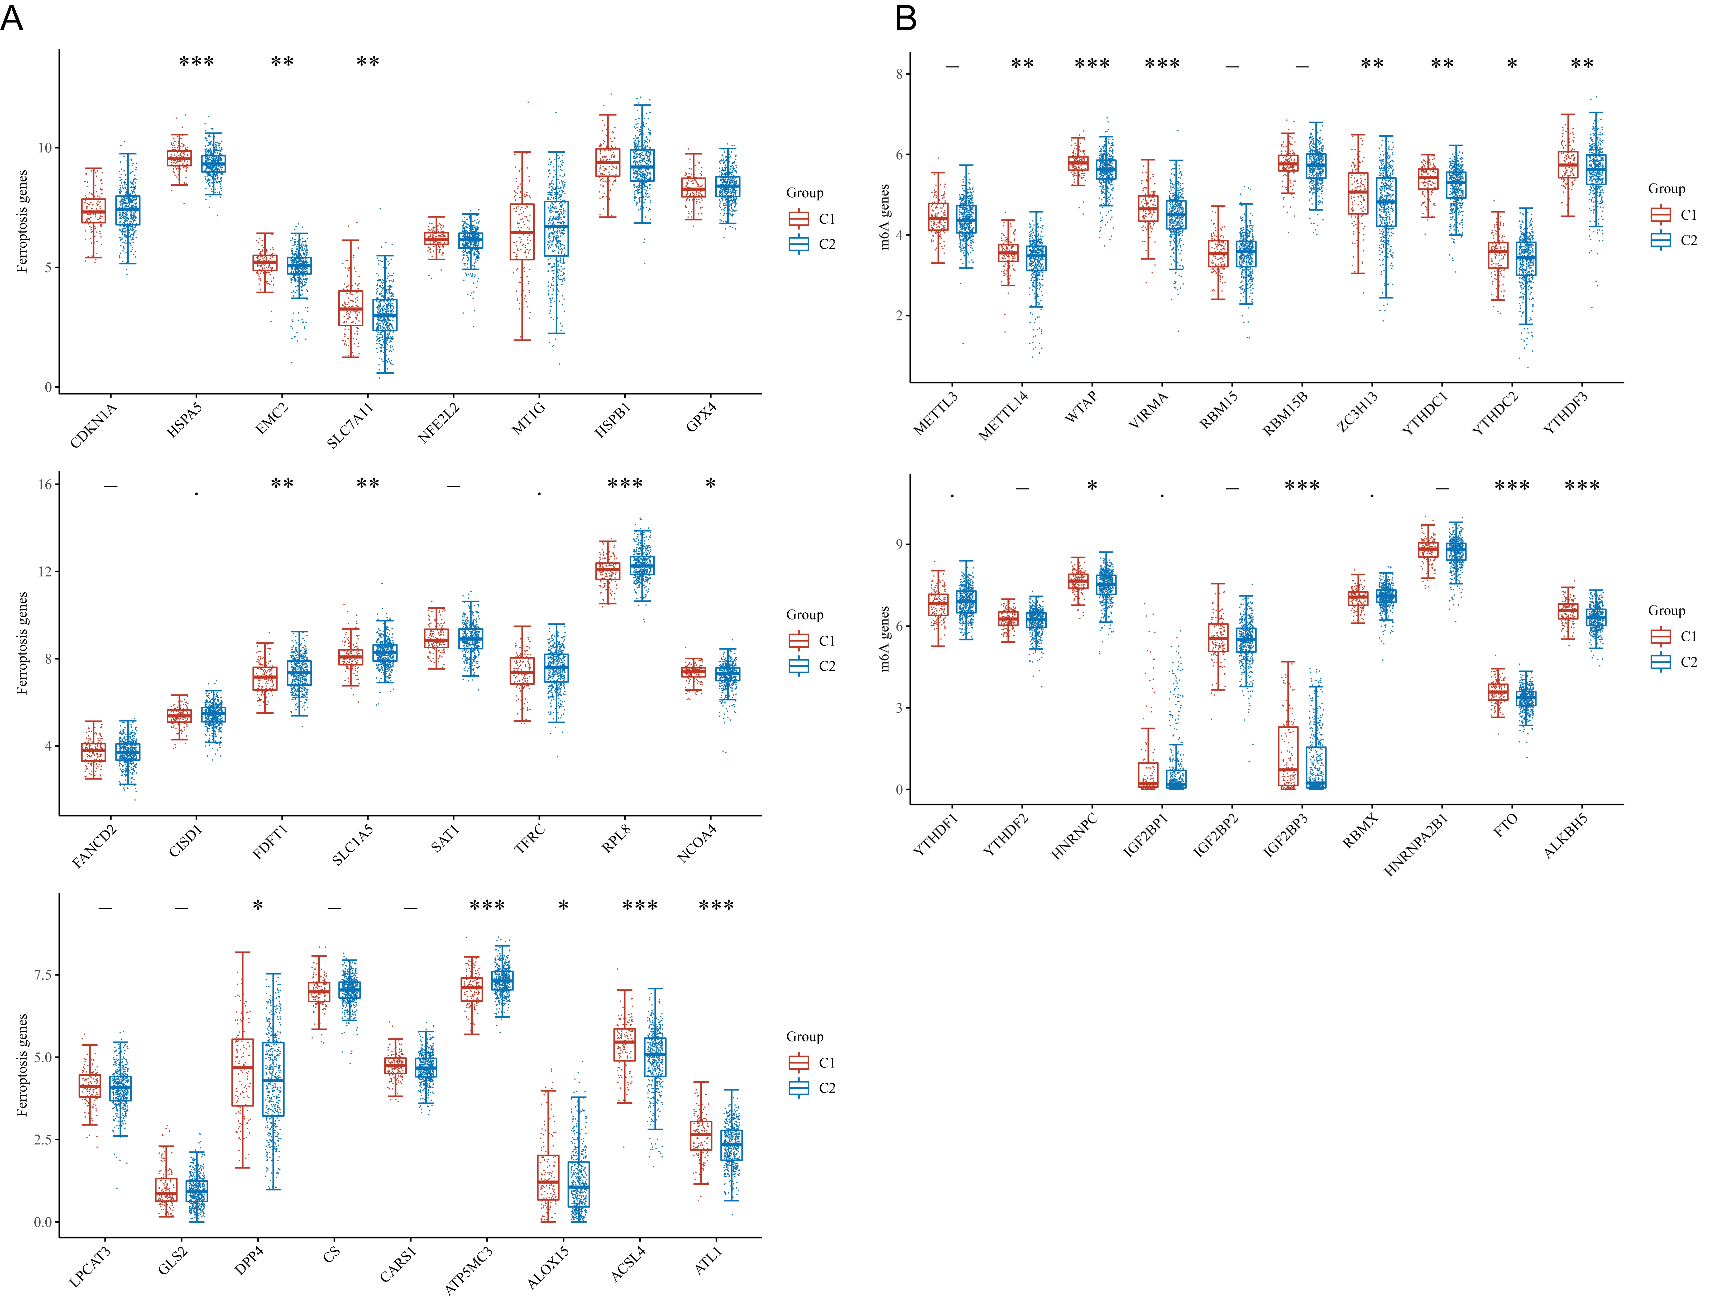


**Supplementary Figure 2.** m6A and ferroptosis-related genes distributed on cluster C1 and C2.

(*P < 0.05, **P < 0.01, ***P < 0.001)

## Supplementary Table 1

| **Antibodies and Reagents** | **Manufacturer, Country, Batch number** | **Concentration** |
| --- | --- | --- |
| Anti-Cx37/GJA4 Antibody | Santa Cruz Biotechnology, USA, Lot: ab181701 | IHC: 1:500  IF: 1:1000 |
| anti-CD163 polyclonal antibodies | Proteintech, China, Lot: 00091171 | 1:1000 |
| Alexa Fluor 488 AffiniPure goat anti-mouse IgG (H+L) | FcMACS, China, Lot: 136908 | 1:2000 |
| Goat anti-mouse IgG (H+L) CoraLite 594 | Proteintech, China, Lot: 20000154 | 1:1000 |
| Goat anti-rabbit IgG (H+L) R-PE conjugate | Proteintech, China, Lot: 20000129 | 1:1000 |

## Immunohistochemical staining

After blocking tissue sections with protein blocking solution, slides were incubated with GJA4 Antibody. IHC results (intensity and extent of staining) were independently scored by two observers. Staining intensity was graded as follows: 0, negative staining; 1, weak staining; 2, moderate staining; and 3, strong staining. The extent of staining was scored based on the proportion of positively stained cells per specimen, as follows: 0, no positively stained cells; 1 <10% positively stained cells; 2, 10–50% positively stained cells; and 3, >50% positively stained cells. The histochemistry score (H-SCORE), which represents the proportion of positively stained cells and the intensity of expression, was calculated as follows: H-SCORE= ∑(PI × I) = (percentage of cells with weak intensity × 1) + (percentage of cells with moderate intensity × 2) + (percentage of cells with strong intensity × 3). In the formula, PI represents the percentage of positive cells to the total number of cells in a particular field and I represent the intensity of staining. The H-SCORE ranges from 0 to 300, with a higher score representing stronger positive staining.

##

## Tissue Section Immunofluorescence staining

Immunofluorescence staining was performed on the tissue sections. After blocking in 5% bovine serum albumin in phosphate-buffered saline, 0.1% Tween followed by an overnight incubation (4 °C) with the primary antibody. This procedure was followed by an incubation with the secondary antibodies. Nuclei were stained using 4',6-diamidino-2-phenylindole (DAPI) for 3 min, and the cells were incubated in the dark for 3 min. The slides were washed with phosphate buffered saline (PBS) four times, for 5 min each. Then, the slides were sealed with sealing solution containing a fluorescence quencher and observed and imaged under a fluorescence microscope.
